# Supplementary material for: Genome-wide identification and functional prediction of cold and/or drought-responsive lncRNAs in cassava
Source: PubMed Central journal article supplement (PMC5384091; doi:10.1038/srep45981), 2017-04-07

Supplementary information

Genome-wide identification and functional prediction of cold and/or drought-responsive  
lncRNAs in cassava

Shuxia Li<sup>1†</sup>, Xiang Yu<sup>2†</sup>, Ning Lei<sup>1</sup>, Zhihao Cheng<sup>3</sup>, Pingjuan Zhao<sup>1</sup>, Yuke He<sup>2</sup>, Wenquan  
Wang<sup>1</sup> & Ming Peng<sup>1\*</sup>

Supplemental Figure S1. Physiological investigation and expression analysis of stress-responsive genes in cassava. (A) Phenotypic changes of cassava in response to PEG-induced drought stress. Bar=1 cm. (B-D) qRT-PCR analysis of the transcript levels of *MeRD26* (B), *MeRD29*(C) and *MeDREB2* (D) under 20%PEG treatment, respectively. (E, F) Relative expression levels of *MeCBF1* (E), and *MeCBF2* (E) response to cold stress, respectively. The values shown are the means  $\pm$  standard deviation of three replicates. *MeACTIN* was used as the reference gene.

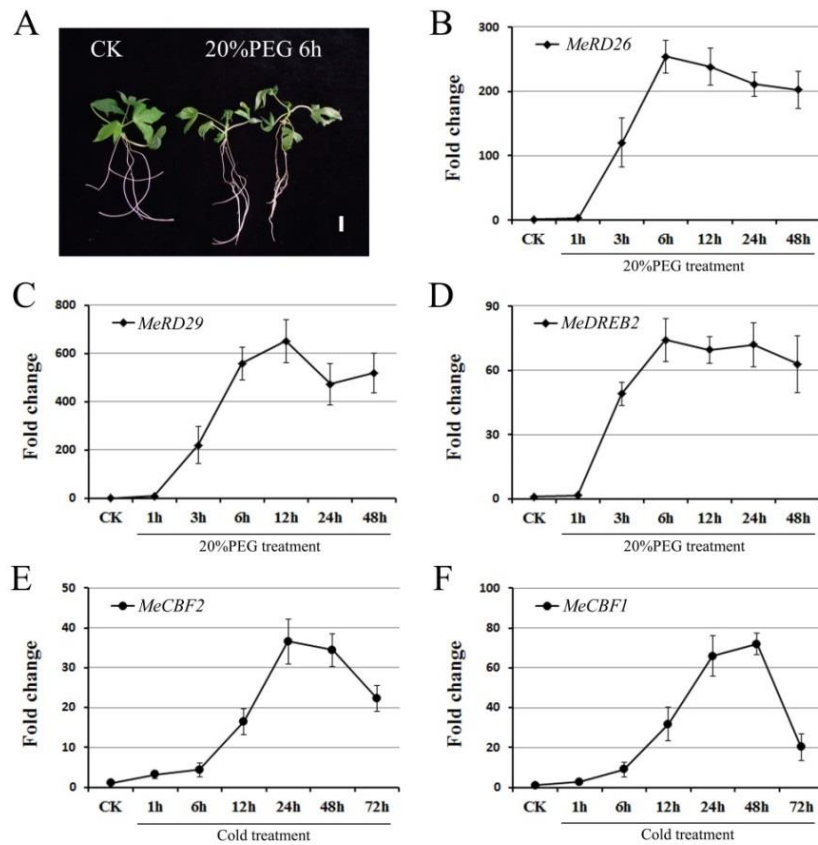

Supplemental Figure S2. GO analysis of the cold- or drought-responsive lncRNA targets.

The color of the rectangle represents q value.

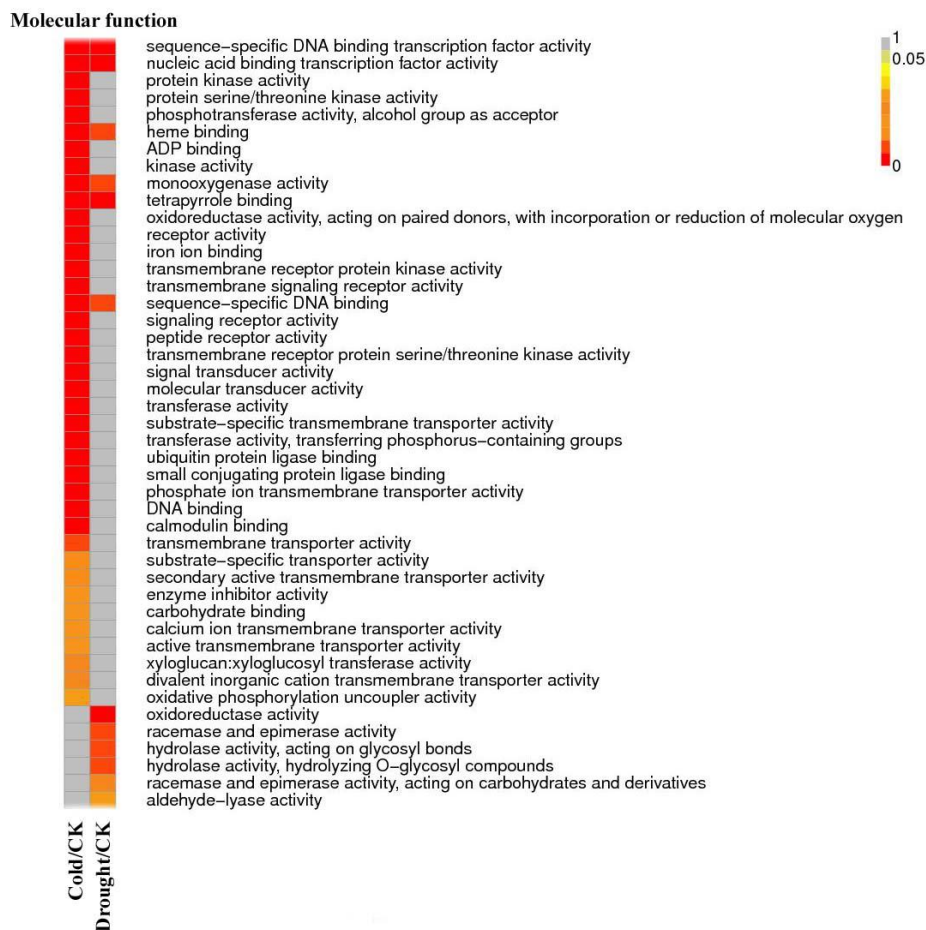

Supplement: srep45981-s2.pdf [file srep45981-s2.pdf]
